# **The unsolved problem of otitis media in indigenous populations: A systematic review of upper respiratory and middle ear microbiota in indigenous children**

1 Andrea Coleman, a.coleman2@uq.edu.au<sup>1,2\*</sup>

2 Amanda Wood, Amanda.Wood2@health.qld.gov.au<sup>3</sup>

3 Seweryn Bialasiewicz, seweryn@uq.edu.au<sup>2</sup>

4 Robert S Ware, r.ware@griffith.edu.au<sup>4</sup>

5 Robyn L Marsh, Robyn.Marsh@menzies.edu.au<sup>5</sup>

6 Anders Cervin, a.cervin@uq.edu.au<sup>1,6</sup>

7 <sup>1</sup>Faculty of Medicine, The University of Queensland, Brisbane, Queensland, Australia

8 <sup>2</sup>Queensland Pediatric Infectious Disease Laboratory, Centre for Children's Health Research,

9 Children's Health Queensland Hospital & Queensland University of Technology, Child Health

10 Research Centre, The University of Queensland, Brisbane, Queensland, Australia

11 <sup>3</sup>The Deadly Ears Program, Children's Health Queensland Hospital and Health Service,

12 Brisbane, Queensland, Australia

13 <sup>4</sup>Menzies Health Institute Queensland, Griffith University, Brisbane, Queensland, Australia

14 <sup>5</sup>Menzies School of Health Research, Charles Darwin University, Darwin, Northern Territory,

15 Australia

16 <sup>6</sup>Department of Otolaryngology Head & Neck Surgery, Royal Brisbane and Women's Hospital,  
17 Brisbane, Queensland, Australia

18 \* **Correspondence:**

19 Dr Andrea Coleman

20 a.coleman2@uq.edu.au

21 Queensland Paediatric Infectious Disease Laboratory

22 Centre for Children's Health Research

23 62 Graham Street, South Brisbane

24 QLD 4101, Australia

25

26 **Abstract**

27 **Background:** Otitis media (OM) imposes a great burden of disease in indigenous populations  
28 around the world, despite a variety of treatment and prevention programs. Improved  
29 understanding of the pathogenesis of OM in indigenous populations is required to advance  
30 treatment and reduce prevalence. We conducted a systematic review of the literature exploring  
31 upper airway and middle ear microbiota in relation to OM in indigenous children.

32 **Methods:** Papers targeting microbiota in relation to OM in children <18 years indigenous to  
33 Australia, New Zealand, North America, and Greenland were sought. MEDLINE, CINAHL,  
34 EMBASE, Cochrane Library, and Informit databases were searched using key words. Two  
35 independent reviewers screened titles, abstracts, and then full-text papers against inclusion  
36 criteria according to PRISMA guidelines.

37 **Results:** Twenty-five papers considering indigenous Australian, Alaskan and Greenlandic  
38 children were included. There were high rates of nasopharyngeal colonization with the three  
39 main otopathogens (*Haemophilus influenzae*, *Streptococcus pneumoniae*, and *Moraxella*  
40 *catarrhalis*) in indigenous children with OM. Middle ear samples had lower rates of otopathogen  
41 detection, although detection rates increased when molecular methods were used. *Pseudomonas*  
42 *aeruginosa* and *Staphylococcus aureus* were commonly detected in middle ear discharge of  
43 children with chronic suppurative OM. There was significant heterogeneity between studies,  
44 particularly in microbiological methods, which were largely limited to culture-based detection of  
45 the main otopathogens.

46 **Conclusions:** There are high rates of otopathogen colonization in indigenous children with OM.  
47 Chronic suppurative OM appears to be associated with a different microbial profile. Beyond the

48 main otopathogens, the data are limited. Further research is required to explore the entire upper  
49 respiratory tract/ middle ear microbiota in relation to OM, with the inclusion of healthy  
50 indigenous peers as controls.

51 Keywords: otitis media, indigenous, microbiota, pediatrics, systematic review

52

## 53 **Introduction**

54 Otitis media (OM) describes a spectrum of pathologies that involve inflammation and/or  
55 infection in the middle ear. This spectrum encompasses a continuum from acute to chronic  
56 disease that is clinically characterised by fluid in the middle ear [1-4]. OM is highly prevalent in  
57 indigenous populations globally, particularly when compared to non-indigenous peers [5, 6], and  
58 often occurs earlier, more frequently and in more severe forms [4, 5, 7]. Prevalence data reports  
59 that up to one-third of Greenlandic and Alaskan Inuit, Native American and Australian  
60 Indigenous children suffer from chronic suppurative OM (CSOM) [6, 8-11]. The World Health  
61 Organization considers CSOM prevalence of  $\geq 4\%$  indicative of a public health problem serious  
62 enough to require urgent attention [12]. OM-related complications result in approximately  
63 21,000 deaths each year worldwide [13]. OM-associated hearing loss can impact significantly on  
64 language and social skills development, school attendance and educational outcomes, and  
65 downstream effects such as greater contact with the criminal justice system later in life [4, 14,  
66 15]. Medical interventions including liberal antibiotic prescription and vaccination programs  
67 have limited effectiveness in indigenous populations [16-19], thus new treatment avenues need  
68 to be considered.

69 The reasons for high OM prevalence in indigenous populations are likely to be multi-factorial.  
70 Risk factors include poverty, inadequate housing, overcrowding, and exposure to environmental  
71 tobacco smoke [6, 8, 20, 21]. These risk factors are ubiquitous across indigenous populations  
72 worldwide [22]. Genetic susceptibility to OM has not been studied in indigenous populations  
73 [23, 24].

74 The microbiota of the upper respiratory tract (URT) is an important OM risk factor across all  
75 populations. Most research to date has focused on the role of the three main otopathogens:

76 *Streptococcus pneumoniae*, *Moraxella catarrhalis*, and non-typeable *Haemophilus influenzae*  
77 [25]. It is not currently clear whether commensal bacteria amongst the URT microbiota  
78 contribute to, or mitigate, OM risk in indigenous children. In non-indigenous children, 16S  
79 ribosomal RNA (rRNA) gene analyses have suggested that a ‘healthy’ nasopharyngeal (NP)  
80 microbiota is more diverse than that of children with OM [26-29]. This ‘healthy’ NP microbiota  
81 contains bacteria that may be protective or promote microbiota stabilization, including,  
82 *Moraxella*, *Corynebacterium*, *Dolosigranulum*, *Propionibacterium* (*Cutibacterium*),  
83 *Lactococcus* and *Staphylococcus* [26-29]. It is currently unknown whether these results are  
84 generalizable to indigenous populations.

85 While high rates of OM are reported for many developing countries, indigenous populations, as  
86 defined by the United Nations [30], share unique challenges in relation to OM. The aim of this  
87 systematic review is to assess the data pertaining to the NP and middle ear microbiota in relation  
88 to OM affecting indigenous children around the world.

## 89 **Methods**

90 Methods used for this systematic review were developed with reference to the Preferred  
91 Reporting Items for Systematic Reviews and Meta-Analyses (PRISMA) Statement. The protocol  
92 was registered with the International Prospective Register of Systematic Reviews (PROSPERO)  
93 (CRD42016033905) prior to commencement.

### 94 *Inclusion criteria*

95 All studies exploring the microbiota of the URT (nose, nasopharynx, mouth, oropharynx, throat,  
96 tonsils, adenoid, and middle ear) in relation to OM in indigenous children aged 0-18 years old  
97 were included. For studies that included children without OM and/or did not report microbiology  
98 results specifically for children with OM, either only middle ear data were included, or if only

99 the NP was sampled, the studies were excluded. Indigenous populations from Australia, New  
100 Zealand, United States of America, Canada, and Greenland were included.

### 101 *Search strategy*

102 Literature search strategies were developed in collaboration with a health sciences librarian using  
103 medical subject headings (MeSH) and key words (Additional File 1). The following electronic  
104 databases were searched from inception until 15 August 2017: MEDLINE (from 1946) and  
105 CINHAL (from 1982) via EBSCOhost, EMBASE (from 1966), Cochrane Library (from 1996),  
106 and Informit (from 1990- April). To ensure search saturation, we reviewed the reference lists of  
107 relevant studies and sought unpublished clinical audits through the Australian Institute of Health  
108 and Welfare (<https://www.aihw.gov.au/>) and The Australian Indigenous Health Info Net  
109 (<https://healthinfonet.ecu.edu.au/>). Two independent reviewers (ACol and AW) revised titles and  
110 abstracts, then full text publications with reference to the inclusion criteria. Study selection inter-  
111 rater agreement between the two reviewers was calculated as the proportion of positive  
112 agreement (PA) [31].

### 113 *Data extraction*

114 Two independent reviewers (ACol and AW) extracted data in duplicate onto a Microsoft Excel  
115 spreadsheet. Publication authors were contacted where data had been represented graphically or  
116 data were missing. We screened for multiple reports from the same study, and where multiple  
117 reports existed, compared and extracted relevant data; if inconsistencies existed, we contacted  
118 the authors for clarification. The following data were extracted for all studies meeting inclusion  
119 criteria: publication year, geographical location, study design, number of participants, age range,  
120 ethnicity, number of participants with an OM diagnosis, type of OM, number of controls,  
121 anatomical location of sample(s), microbiota investigation method, type and quantity of bacteria,

122 viruses, and fungi detected from each anatomic site. For the purpose of the review ‘culture’ is  
123 defined as culture targeting the three main otopathogens and ‘extended culture’ is defined as  
124 culture used to detect bacteria beyond these otopathogens. Only quantitative PCR (qPCR) data  
125 were included when both culture and qPCR were used. For longitudinal studies, data relating to  
126 both the number of swabs and number of children were extracted, when there were multiple  
127 swabs per child. For data obtained from clinical trials, we included data only from samples  
128 collected prior to randomization.

### 129 *Data analysis*

130 Where there were a sufficient number of studies, meta-analysis of proportions were calculated  
131 using random effects analysis via Stata/IC 15, otherwise we synthesized the data into a  
132 systematic narrative. We calculated heterogeneity using  $I^2$  statistic.

### 133 *Risk of bias assessment*

134 Two independent reviewers (ACol and AW) assessed the risk of bias for each study with  
135 reference to the Critical Appraisal Skills Program (CASP) Cohort Study Checklist [32]. Within  
136 the CASP Checklist, we assessed for the following confounding variables: age, overcrowding,  
137 antibiotic use, daycare/ school attendance, and concurrent respiratory/ upper respiratory tract  
138 infection. Study quality was categorized as 'poor', 'moderate' or 'good' based on the CASP  
139 Checklist. The overall quality of evidence was judged as high, moderate, low, and very low [33].

## 140 **Results**

141 The initial search identified 5592 articles. After screening titles, the abstracts of 956 articles and  
142 332 full text publications were reviewed (Figure 1). There was substantial PA between the  
143 reviewers of titles (PA = 0.68) and abstracts (PA = 0.79). Twenty-five articles met the inclusion  
144 criteria; these were from Australian Indigenous (n=22), Greenlandic (n=2) and Alaskan Inuit



145 (n=1). No papers reported OM otopathogens or microbiota in Native American or New Zealand  
146 Maori children.

#### 147 *Risk of bias assessment*

148 According to the CASP risk of bias assessment, most studies (80%) were judged as either ‘poor’  
149 or ‘moderate’, largely due to confounding variables not being considered (Table 1). Recruitment  
150 bias was difficult to assess, as recruitment processes were often poorly documented. Only one  
151 study [34] included healthy indigenous controls and another three [21, 35, 36] included children  
152 without OM enrolled in longitudinal studies. Within indigenous populations, participants were  
153 recruited from limited geographical regions, making generalization beyond these regions  
154 difficult. Overall, the quality of the literature was ‘low’.

#### 155 *Heterogeneity*

156 The literature was limited by methodological and statistical heterogeneity across the studies,  
157 including heterogeneity in study design, participant age, OM diagnosis, and laboratory methods  
158 (Table 2). Where there were sufficient data to calculate  $I^2$ ; most were  $>70\%$ , indicating  
159 moderate-high heterogeneity (Figure 2-4).

#### 160 *OM clinical definitions and diagnosis*

161 OM definitions used by the studies are outlined in Additional File 2. Acute OM (AOM)  
162 definitions were consistently based on otoscopy and tympanometry. OM with effusion (OME)  
163 was diagnosed based on a type-B tympanogram in 5/8 studies; the remaining three studies [37-  
164 39] reported data from intra-operative middle ear effusion (MEE) samples, without specifying  
165 OME diagnostic criteria. CSOM definitions were heterogeneous and included otorrhoea for  $>2$   
166 weeks [40, 41],  $>6$  weeks [42], and broad descriptive terms [39, 43]. Three studies did not  
167 describe specific OM diagnostic criteria [44-46].

168 *Laboratory methods*

169 Methods used to assess URT and middle ear bacteriology varied across studies (Table 2). Most  
170 studies (13/25) used culture conditions specific for detection of the main otopathogens. Nine  
171 studies used extended culture to detect a wider range of bacteria. For the culture-based studies,  
172 methodological details varied. Most culture-based studies (13/22) described the agar plates used  
173 and growth conditions [17, 21, 34, 36-40, 42, 43, 47-49]; however, reporting of phenotypic  
174 isolate identification tests varied. The remaining studies used non-specific terms or referred to  
175 other papers [44-46, 50-55].

176 Three studies used only molecular methods: two used species-specific qPCR targeting the main  
177 otopathogens or *Alloiococcus otitidis* [35, 56], and one used 16S rRNA gene sequencing [57].  
178 One study used both culture and qPCR [48]. The three studies using qPCR [35, 48, 56] used the  
179 same gene targets for *S. pneumoniae* and *M. catarrhalis*. Two studies used the *hpd* gene to detect  
180 *H. influenzae* [35, 56] while another used an alternative gene target, *hpd3* [48]. Only one paper  
181 used qPCR to detect *A. otitidis* [56].

182 *Bacteriology*

183 Acute otitis media

184 AOM bacteriology was reported for Australian and Greenlandic indigenous children, with high  
185 prevalence of the three main otopathogens in NP/nose and middle ear specimens across both  
186 populations (Figure 2 and Additional File 3). Co-infection with >1 otopathogen was common in  
187 the NP, although less frequent in MED (Additional File 3). NP colonization by *S. pneumoniae*  
188 (both populations) or *M. catarrhalis* (Australian Indigenous) was significantly related to AOM  
189 when compared to indigenous peers without OM [34, 35]. Beyond the main otopathogens, *A.*  
190 *otitidis*, *Staphylococcus* spp. and  $\beta$  hemolytic streptococcus were also detected in the middle ear

191 discharge (MED) of children with AOM with perforated tympanic membrane (AOMwP)

192 (Additional File 4).

193 Otitis media with effusion

194 The one study investigating NP microbiota, and all but one study exploring MEE in children

195 with OME were from Australian Indigenous children. The three main otopathogens were highly

196 prevalent in the NP in children with OME (Figure 3 and Additional File 3), although only *S.*

197 *pneumoniae* and *M. catarrhalis* were significantly related to OME in the one study that included

198 a control group [35]. Culture-based studies reported a low prevalence of otopathogens in MEE

199 (Figure 3, Additional File 3); however, much higher rates were detected in the single study that

200 used molecular methods [57] (Figure 3). Other bacteria detected in MEE by extended culture

201 included *A. otitidis*, *Corynebacterium* spp., *Pseudomonas aeruginosa* and *S. aureus* (Additional

202 File 4). The single 16S rRNA gene sequencing analysis (Australian Indigenous children) [57]

203 found high rates of the genera *Dolosigranulum*, *Moraxella*, *Haemophilus* and *Streptococcus*

204 (Mitis group) in the NP, and *Alloiococcus*, *Haemophilus* and *Corynebacterium* in MEE

205 (Additional File 5)

206 Chronic suppurative otitis media

207 All but one study investigating CSOM were from Australian Indigenous children. The most

208 commonly reported bacteria from culture-based studies of MED from children with CSOM were

209 *P. aeruginosa*, *S. aureus*, and *H. influenzae* (Figure 4). *P. aeruginosa* and *H. influenzae* were

210 often detected in Australian Indigenous children, but not in the single study of Greenlandic Inuit

211 children (Figure 4). Yeasts were reported in two Australian Indigenous studies (Additional File

212 4); one study [40] only detected *Candida*, *Aspergillus*, *Fusarium*, *Alternaria*, *Rhodotorula*,

213 *Auerobasidium* or *Acrinonium* in 5% of MED samples. The other study [43] did not identify or

214 specify the yeasts or fungi detected. No study used molecular methods to explore the URT or  
215 middle ear microbiota in CSOM.

### 216 *Nasopharyngeal carriage as a risk factor for otitis media*

217 Two prospective cohort studies in Australian Indigenous children explored NP carriage of the  
218 three main otopathogens as a risk factor for OM (all types) [21, 36]. A birth cohort study by  
219 Leach *et al.* found that 31/36 (86%) children with their first episode of OM were colonized with  
220 at least one otopathogen [21]. This relationship between NP colonization and OM was stronger  
221 when >1 otopathogen was detected in the NP (odds ratio (OR) = 33.6, 95% CI 7.9 to 144) [21].  
222 More recently, Sun *et al.* found that in Australian Indigenous children, early colonization (1 to  
223 <3 months of age) with *H. influenzae* was associated with OM in the first two years of life (OR =  
224 3.71, 95% CI 1.22 to 11.23) [36]. All children (100%) who carried *H. influenzae* with either of  
225 the other main otopathogens were subsequently diagnosed with OM [36].

### 226 *Virology*

227 One Australian [35] and one Greenlandic study [34] tested for viruses in children with OM  
228 (Additional File 4). These studies used different methods for viral detection and, aside from  
229 rhinovirus, tested for different viruses (Table 2). In Indigenous Australian children, only  
230 adenovirus in the NP was related to AOM (19%) and AOMwP (20%) compared to control  
231 children (6%) [35]. There was no relationship between the detection of viruses in the NP and  
232 OME [35]. In Greenlandic Inuit children, enteroviruses, rhinoviruses or ‘unspecified virus’ in the  
233 NP was related to AOM, compared to controls [34]. No studies tested for viruses in middle ear  
234 specimens in AOMwP, OME, or CSOM.

### 235 *Biofilm*

236 One Greenlandic study used PNA-FISH to test for biofilm in middle ear specimens from children  
237 with CSOM or OME (obtained via sterile aspiration) [39]. Biofilm was detected in 5/6 (83%)  
238 MED samples from children with CSOM using a Eubacterial probe, but not in MEE from seven  
239 children with OME [39]. Further testing with species-specific probes found most biofilms (66%)  
240 contained *S. aureus*. One further sample contained a *Stenotrophomonas maltophilia* biofilm. For  
241 *S. aureus* and *S. maltophilia*, there was a 100% agreement between culture, Gram-staining and  
242 PNA-FISH results [39]. Species-specific probes targeting the main otopathogens were not tested.

## 243 **Discussion**

244 This systematic review found the NP of most indigenous children with OM were colonized with  
245 the main otopathogens, particularly those with AOM. In contrast, children with CSOM  
246 demonstrate a different middle ear microbial profile compared to children with AOM and OME.  
247 Beyond the typical culturable bacteria, data are sparse, limiting our understanding of how the  
248 broader microbiota of the URT may contribute to OM pathogenesis and persistence in  
249 indigenous populations. The entire OM microbiome across all indigenous populations needs  
250 further investigation.

251 Our analysis highlights the important role of *S. pneumoniae* and *H. influenzae* in the  
252 pathogenesis of AOM/AOMwP and OME across indigenous populations, consistent with data  
253 from non-indigenous populations [58]. These otopathogens were detected at low rates in middle  
254 ear samples from children with AOMwP and OME; however, when molecular techniques were  
255 employed detection rates were much higher, particularly for *H. influenzae* [57], consistent with  
256 the increased sensitivity of molecular methods compared to culture [56, 59]. This suggests that  
257 current data, which are predominantly culture-based, may underestimate the prevalence of  
258 otopathogen colonisation in middle ear samples from indigenous children.

259 A different pathogen profile was reported from children with CSOM, including, *P. aeruginosa*,  
260 *S. aureus*, *H. influenzae* and fungi/ yeasts. Commensurate with this result, culture-based  
261 literature from non-indigenous children with CSOM often report *P. aeruginosa* and *S. aureus* in  
262 MED [60-65]. 16S rRNA gene sequencing of MED from children and adults with CSOM in New  
263 Zealand further detected *Alloiococcus* and *Streptococcus* [66]. In the CSOM studies included in  
264 this review, *Alloiococcus* would not have been detected, if present, as the specialist culture  
265 conditions or PCR required to detect this species were not used. The chronic perforation of the  
266 tympanic membrane in CSOM may allow for secondary infection of the middle ear by microbes  
267 present in the external auditory canal and could account for the different microbial profile  
268 compared to other types of OM. Confirming this; however, is difficult, particularly where a child  
269 has had prolonged otorrhoea with ear discharge draining into the canal. Sampling the canal flora  
270 of children with intact tympanic membranes as a comparison, may provide a solution.

271 Biofilms have been reported in middle ear specimens from non-indigenous children with CSOM  
272 and OME [41, 59, 67-69]; however, this systematic review uncovered very little data pertaining  
273 to biofilm in relation to OM in indigenous children. Considering the high rates of chronic OM,  
274 particularly CSOM, this is a noteworthy deficit of the literature.

275 This systematic review suggests other microbes, beyond the main otopathogens, may be  
276 contributing to OM in indigenous populations; however, there are few data relating to these taxa.  
277 Furthermore, detection of these microbes can require specific laboratory techniques. For  
278 example, *A. otitidis* detection requires extended culture methods [37] or molecular methods [56,  
279 57]. Where these methods have been used, *A. otitidis* was commonly detected [37, 56, 57];  
280 however, it remains controversial whether detection of this species is associated with the middle  
281 ear infection or specimen contamination by canal flora [56]. Viruses were seldom investigated in

282 the included studies, and when investigated, different viruses were sought, and detection  
283 methods varied. Furthermore, only NP specimens were tested. Viruses are likely to play an  
284 important role in OM pathogenesis [70], through numerous potential mechanisms including  
285 altering the host immune response [71] and reducing response to antibiotic therapy [72]. Further  
286 research is required to determine the contribution of respiratory viruses in OM pathogenesis.

### 287 *Limitations of the current literature*

288 The current literature is limited by methodological heterogeneity, in both the types of laboratory  
289 methods used and the OM definitions and diagnoses. The greatest source of methodological  
290 heterogeneity was the diversity of methods used to analyze the samples with varying specificities  
291 and sensitivities. Inconsistencies in OM definitions and diagnoses were most apparent in the  
292 CSOM data, reflecting the absence of internationally accepted definitions [73]. Other OM  
293 diagnoses were more consistent, largely because the data was published from a limited number  
294 of research groups. International guidelines on OM definitions, diagnosis and investigation of  
295 URT/ middle ear microbiota are needed. This will allow for more meaningful comparison of  
296 studies from around the world and facilitate future meta-analysis.

297 The quality of the data included in this review is impacted by the absence of healthy indigenous  
298 controls; limited information on participant recruitment; poor consideration of confounding  
299 variables; multiple studies where the microbiology is not the primary aim of the study; and  
300 population overlap. The absence of healthy indigenous control children may reflect the high  
301 burden of disease in many of these populations, for example <10% of Australian Indigenous  
302 children living in remote areas have healthy ears [7]. To establish a 'OM microbiota',  
303 comparison with healthy indigenous peers is required. Similarly, if samples from the external  
304 auditory canal are included when analyzing middle ear specimens, we may be able to delineate

305 the role of microbes as contaminate, pathogen or secondary pathogen (e.g. *A. otitidis*). There  
306 was significant population overlap and small geographical area of recruitment for many studies  
307 in Australian Indigenous children. There is documented discordance in OM burden and  
308 prevalence of otopathogen colonization between urban and remote Australian Indigenous  
309 children [74, 75]. Therefore, this limited area of recruitment may impact on generalization of  
310 results across Australian Indigenous children.

### 311 *Future directions*

312 To further our understanding of OM pathogenesis in indigenous populations, and to build upon  
313 the current pathogen-based disease model, further research is required to investigate the vast  
314 array of microbes that can occupy the URT, and how they relate to the known otopathogens to  
315 cause disease. The inclusion of healthy indigenous peers is vital to this goal. Identification of a  
316 ‘healthy’ microbiota in indigenous populations may uncover ‘protective’ microbes that can be  
317 developed into microbiome/ probiotic therapies to protect children from OM. To achieve this  
318 outcome, next generation sequencing can enable deeper exploration of the microbiota without *a*  
319 *priori* assumptions about the underlying bacterial community, which is required to guide culture-  
320 based methods. 16S rRNA gene sequencing, although limited by poor resolution at the species-  
321 level, can be augmented by qPCR to provide species-level identification [76]; however, this  
322 requires *a priori* assumptions about the bacteria that should be targeted. Likewise, qPCR for  
323 specific viruses is limited by *a priori* assumptions. These limitations may be overcome with  
324 metagenomic shotgun sequencing if the method can be optimized to overcome the technical  
325 limitations related to high proportions of human DNA in middle ear specimens. Alternatively,  
326 extended culture with MALDI-TOF can be used to provide a broader analysis of the microbiota



327 to the species level [77] and has the benefit of providing material for further studies, such as  
328 bacterial interference studies.

### 329 **Conclusions**

330 The URT microbiology in OM is highly complex and dynamic. Through this systematic review  
331 we demonstrated that the three main otopathogens are important in the pathogenesis of AOM  
332 across the indigenous populations included, and in non-indigenous peers. There is; however, a  
333 vast community of microbes present in the URT. How these microbes interact to promote or,  
334 perhaps more importantly protect, indigenous children from OM requires further investigation.  
335 With a more wholistic understanding of the microbial pathogenesis of OM in indigenous  
336 populations, we will be better equipped to develop new methods to prevent and treat OM in these  
337 populations.

### 338 **Competing interests**

339 The authors declare that they have no competing interests.

### 340 **Funding**

341 Coleman received support from an Avant Doctors in Training Research Scholarship, an NHMRC  
342 Postgraduate Research Scholarship (APP1133366) and a Queensland Health Junior Doctor  
343 Fellowship.

344 Marsh is supported by the NHMRC CRE in Respiratory Health of Aboriginal and Torres Strait  
345 Islander Children, grant number 1040830.

346 Cervin is support by the University of Queensland Faculty of Medicine Strategic Funding and  
347 The Garnett Passe & Rodney Williams Memorial Foundation.

## 348 References

- 349 1. Coticchia JM, Chen M, Sachdeva L, Mutchnick S. New paradigms in the pathogenesis of  
350 otitis media in children. *Front Pediatr*. 2013;1:52.
- 351 2. Darwin Otitis Guidelines Group. Recommendations for Clinical Care Guidelines on the  
352 Management of Otitis Media in Aboriginal and Torres Strait Islander Populations. 2010.
- 353 3. Burns J, Thomson N. Review of ear health and hearing among Indigenous Australians.  
354 2013. [[http://www.healthinfonet.ecu.edu.au/other-health-conditions/ear/reviews/our-](http://www.healthinfonet.ecu.edu.au/other-health-conditions/ear/reviews/our-review)  
355 [review](http://www.healthinfonet.ecu.edu.au/other-health-conditions/ear/reviews/our-review)]. Accessed 02.03.2014.
- 356 4. Kong K, Coates HLC. Natural history, definitions, risk factors and burden of otitis media.  
357 *Med J Aust*. 2009;191:S39-S43.
- 358 5. Daly KA, Hoffman HJ, Jorunn Kvaerner K, Kvestad E, Casselbrant ML, Homoe P,  
359 Rovers MM. Epidemiology, natural history, and risk factors: Panel report from the Ninth  
360 International Research Conference on Otitis Media. *Int J Pediatr Otorhinolaryngol*.  
361 2010;74:231-240.
- 362 6. Bhutta MF. Evolution and Otitis Media: A Review, and a Model to Explain High  
363 Prevalence in Indigenous Populations. *Hum Biol*. 2015;87:92-108.
- 364 7. Morris P, Leach AJ, Silberberg P, Mellon G, Wilson C, Hamilton E, Beissbarth J. Otitis  
365 media in young Aboriginal children from remote communities in Northern and Central  
366 Australia: a cross-sectional survey. *BMC Pediatr*. 2005;5:27.
- 367 8. Jervis-Bardy J, Sanchez L, Carney AS. Otitis media in Indigenous Australian children:  
368 review of epidemiology and risk factors. *The Journal Of Laryngology And Otology*.  
369 2014;128 Suppl 1:S16-S27.
- 370 9. Baxter JD. Otitis media in Inuit children in the Eastern Canadian Arctic—an overview—  
371 1968 to date. *Int J Pediatr Otorhinolaryngol*. 1999;49:S165-S168.
- 372 10. Maynard JE, Fleshman JK, Tschopp CF. Otitis media in Alaskan Eskimo children:  
373 Prospective evaluation of chemoprophylaxis. *JAMA*. 1972;219:597-599.
- 374 11. Homøe P, Christensen RB, Bretlau P. Prevalence of otitis media in a survey of 591  
375 unselected Greenlandic children. *Int J Pediatr Otorhinolaryngol*. 1996;36:215-230.
- 376 12. World Health Organisation. Prevention of hearing impairment from chronic otitis media.  
377 2000.
- 378 13. Monasta L, Ronfan L, Marchetti F, Monico M, Vecchi Brumatti L, Bavcar A, Grasso D,  
379 Barbiero C, Tamburlini G. Burden of disease caused by otitis media: systematic review  
380 and global estimates. *PloS ONE*. 2012;7:e36226.
- 381 14. Williams CJ, Jacobs AM. The impact of otitis media on cognitive and educational  
382 outcomes. *Med J Aust*. 2009;191:S69-S72.
- 383 15. Closing the Gap Clearinghouse (AIHW & AIFS). Ear disease in Aboriginal and Torres  
384 Strait Islander children. Resource sheet no. 35. Produced by the Closing the Gap  
385 Clearinghouse. 2014.
- 386 16. Mackenzie GA, Carapetis JR, Leach AJ, Morris PS. Pneumococcal vaccination and otitis  
387 media in Australian Aboriginal infants: comparison of two birth cohorts before and after  
388 introduction of vaccination. *BMC Pediatrics*. 2009;9:14-14.
- 389 17. Leach AJ, Wigger C, Beissbarth J, Woltring D, Andrews R, Chatfield M, Smith-Vaughan  
390 H, Morris P. General health, otitis media, nasopharyngeal carriage and middle ear  
391 microbiology in Northern Territory Aboriginal children vaccinated during consecutive  
392 periods of 10-valent or 13-valent pneumococcal conjugate vaccines. *Int J Pediatr*  
393 *Otorhinolaryngol*. 2016;86:224-232.

- 394 18. Nicholls TR, Leach AJ, Morris PS. The short-term impact of each primary dose of  
395 pneumococcal conjugate carriage: A systematic review and meta-analysis of randomised  
396 controlled trials. *Vaccine*. 2016;34:703-713.
- 397 19. Leach AJ, Morris PS. Antibiotics for the prevention of acute and chronic suppurative  
398 otitis media in children (Review). *Evid Based Child Health*. 2007;2:697-760.
- 399 20. Gunasekera H, Haysom L, Morris P, Craig J. The global burden of childhood otitis media  
400 and hearing impairment: A systematic review. *Pediatrics*. 2008;121:S107.
- 401 21. Leach AJ, Boswell JB, Asche V, Nienhuys TG, Matthews JD. Bacterial colonisation of  
402 the nasopharynx predicts very early onset and persistence of otitis media in Australian  
403 Aboriginal infants. *Pediatr Infect Dis J*. 1994;13:983-989.
- 404 22. World Health Organisation. Chronic suppurative otitis media: Burden of illness and  
405 management options. 2004.
- 406 23. Daly KA, Pirie PL, Rhodes KL, Hunter LL, Davey CS. Early Otitis Media Among  
407 Minnesota American Indians: The Little Ears Study. *Am J Public Health*. 2007;97:317-  
408 322.
- 409 24. Koch A, Homøe P, Pipper C, Thomas H, Melbye M. Chronic suppurative otitis media in  
410 a birth cohort of children in Greenland: Population-based study of incidence and risk  
411 factors. *Pediatr Infect Dis J*. 2011;30:25-29.
- 412 25. Vergison A. Microbiology of otitis media: A moving target. *Vaccine*. 2008;26:G5-G10.
- 413 26. Biesbroek G, Tsvitvadze E, Sanders E, Montijn R, Veenhoven R, Keijer B, Bogaert  
414 D. Early respiratory microbiota composition determines bacterial succession patterns and  
415 respiratory health in children. *Am J Respir Crit Care Med*. 2014;190:1283-1292.
- 416 27. Sakwinska O, Bastic Schmid V, Berger B, Bruttin A, Keitel K, Legpage M, Moine D,  
417 Ngom Bru C, Brüßow H, Gervaix A. Nasopharyngeal microbiota in healthy children and  
418 pneumonia patients. *J Clin Microbiol*. 2014;52:1590-1594.
- 419 28. Pettigrew M, Laufer A, Gent J, Kong Y, Fennie K, Metlay J. Upper respiratory tract  
420 microbial communities, acute otitis media pathogens, and antibiotic use in healthy and  
421 sick children. *Appl Environ Microbiol*. 2012;78:6262-6270.
- 422 29. Laufer AS, Metlay JP, Gent JF, Fennie KP, Kong Y, Pettigrew MM. Microbial  
423 communities of the upper respiratory tract and otitis media in children. *Mbio*.  
424 2011;2:e00245-e00210.
- 425 30. Asia Pacific Forum, United Nations Human Rights Office of the High Commissioner.  
426 The United Nations Declaration on the Rights of Indigenous Peoples: A Manual for the  
427 National Rights of Institutions. 2013.
- 428 31. de Vet HCW, Dikmans RE, Eekhout I. Specific agreement on dichotomous outcomes can  
429 be calculated for more than two raters. *J Clin Epidemiol*. 2017;83:85-89.
- 430 32. Critical Appraisal Skills Program. CASP Cohort Study Checklist. 2017.  
431 [<http://www.casp-uk.net/casp-tools-checklists>]. Accessed 2nd May 2017.
- 432 33. GRADE Working Group. Grading quality of evidence and strength of recommendations.  
433 *BMJ*. 2004;328:1490.
- 434 34. Homøe P, Prag J, Farholt S, Henrichsen J, Hornsleth A, Killian M, Skov Jensen J. High  
435 rate of nasopharyngeal carriage of potential pathogens among children in Greenland:  
436 Results of a clinical survey of middle-ear disease. *Clin Infect Dis*. 1996;23:1081-1090.
- 437 35. Binks MJ, Cheng AC, Smith-Vaughan H, Sloots T, Nissen M, Whiley D, McDonnell J,  
438 Leach AJ. Viral-bacterial co-infection in Australian indigenous children with acute otitis  
439 media. *BMC Infectious Diseases*. 2011;11.

- 440 36. Sun W, Jacoby P, Riley T, Bowman J, Leach AJ, Coates HLC, Weeks S, Cripps A,  
441 Lehmann D. Association between early bacterial carriage and otitis media in Aboriginal  
442 and non-Aboriginal children in a semi-arid area of Western Australia: a cohort study.  
443 *BMC Infectious Diseases*. 2012;12:366.
- 444 37. Ashhurst-Smith C, Hall S, Walker P, Stuart J, Hansbro P, Blackwell C. Isolation of  
445 *Alloiooccus otitidis* from Indigenous and non-Indigenous Australian children with  
446 chronic otitis media with effusion. *FEMS Immunol Med Microbiol*. 2007;51:163-170.
- 447 38. Parkinson A, Cuthbert M, Bulkow L, Davidson M, Petersen K, Clift S. Bacterial  
448 pathogens in chronic otitis media with effusion in Alaska Native children. *Alaska Med*.  
449 1999;42:27-33.
- 450 39. Homøe P, Bjarnsholt T, Wessman M, Sørensen H, Johansen H. Morphological evidence  
451 of biofilm formation in Greenlanders with chronic suppurative otitis media. *Eur Arch*  
452 *Otorhinolaryngol*. 2009;266:1533-1538.
- 453 40. Couzos S, Lea T, Mueller R, Murray R, Culbong M. Effectiveness of ototopical  
454 antibiotics for chronic suppurative otitis media in Aboriginal children: a community-  
455 based, multicentre, double-blind controlled trial. *Med J Aust*. 2003;179:185-190.
- 456 41. Jensen R, Johansen H, Bjarnsholt T, Eickhardt-Sørensen S, Homøe P. Recurrent otorrhea  
457 in chronic suppurative otitis media: is biofilm the missing link? *Eur Arch*  
458 *Otorhinolaryngol*. 2017;274:2741-2747.
- 459 42. Stephen A, Leach AJ, Morris PS. Impact of swimming on chronic suppurative otitis  
460 media in Aboriginal children: a randomised controlled trial. *Med J Aust*. 2013;199:51-55.
- 461 43. Leach AJ, Wood Y, Gadil E, Stubbs E, Morris PS. Topical Ciprofloxacin versus topical  
462 Framycetin-Gramicidin-Dexamethasone in Australian Aboriginal children with recently  
463 treated chronic suppurative otitis media. *Pediatr Infect Dis J*. 2008;27:692-698.
- 464 44. Copeman R, Pashen D, Burger G. The health of the Aboriginal children of Cunnamulla,  
465 Western Queensland. *Med J Aust*. 1975;1:8-13.
- 466 45. Stuart J. Bacterial flora of the ear, nose, and throat in Aboriginal infants from Brisbane  
467 and Cherbourg. *Med J Aust*. 1975;1:10-44.
- 468 46. Stuart J, Quayle C, Lewis A, Harper J. Health, hearing and ear disease in Aboriginal  
469 school children. *Med J Aust*. 1972;22:855-859.
- 470 47. Leach AJ, Wigger C, Hare K, Hampton V, Beissbarth J, Andrews R, Chatfield M, Smith-  
471 Vaughan H, Morris PS. Reduced middle ear infection with non-typeable *Haemophilus*  
472 *influenzae*, but not *Streptococcus pneumoniae*, after transition to 10-valent pneumococcal  
473 non-typeable *H. influenzae* protein D conjugate vaccine. *BMC Pediatr*. 2015;15.
- 474 48. Smith-Vaughan HC, Binks MJ, Marsh RL, Kaestli M, Ward L, Hare KM, Pizzutto SJ,  
475 Thornton RB, Morris PS, Leach AJ. Dominance of *Haemophilus influenzae* in ear  
476 discharge from Indigenous Australian children with acute otitis media with tympanic  
477 membrane perforation. *BMC Ear, Nose and Throat Disord*. 2013;13.
- 478 49. Stuart J, Butt H, Walker P. The microbiology of glue ear in Australian Aboriginal  
479 children. *Journal Of Paediatrics And Child Health*. 2003;39:665-667.
- 480 50. Gibney KB, Morris PS, Carapetis JR, Skull SA, Smith-Vaughan HC, Stubbs E, Leach AJ.  
481 The clinical course of acute otitis media in high-risk Australian Aboriginal children: a  
482 longitudinal study. *BMC Pediatr*. 2005;5:16-16.
- 483 51. Leach A, MacKenzie G, Hare KM, Stubbs E, Beissbarth J, Kennedy M, Wilson C,  
484 Mellon G, Wigger C, Tippakalipa P, et al. Microbiology of acute otitis media with  
485 perforation (AOMwIP) in Aboriginal children living in remote communities - monitoring

- 486 the impact of 7-valent pneumococcal conjugate vaccine (7vPCV). *Int Congr Ser.*  
487 2006;1289:89-92.
- 488 52. MacKenzie GA, Carapetis JR, Leach AJ, Morris PS. Pneumococcal vaccination and otitis  
489 media in Australian Aboriginal infants: comparison of two birth cohorts before and after  
490 introduction of vaccination. *BMC Pediatr.* 2009;9.
- 491 53. Morris PS, Gadil G, McCallum G, Wilson C, Smith-Vaughan H, Torzillo P, Leach AJ.  
492 Single-dose azithromycin versus seven days of amoxicillin in the treatment of acute otitis  
493 media in Aboriginal children (AATAAC): a double blind, randomised controlled trial.  
494 *Med J Aust.* 2010;192:24-29.
- 495 54. Leach AJ, Morris PS, Mathews J, Chronic Otitis Media Intervention Trial - One  
496 (COMIT1) group. Compared to placebo, long-term antibiotics resolve otitis media with  
497 effusion (OME) and prevent acute otitis media with perforation (AOMwiP) in a high-risk  
498 population: a randomized controlled trial. *BMC Pediatr.* 2008;8.
- 499 55. Dawson VM, Coelen RJ, Murphy S, Graham D, Dyer H, Sunderman J. Microbiology of  
500 chronic otitis media with effusion among Australian Aboriginal children: role of  
501 *Chlamydia trachomatis*. *The Australian Journal Of Experimental Biology And Medical*  
502 *Science.* 1985;63:99-107.
- 503 56. Marsh RL, Binks MJ, Beissbarth J, Christensen P, Morris PS, Leach AJ, Smith-Vaughan  
504 H. Quantitative PCR of ear discharge from Indigenous Australian children with acute  
505 otitis media with perforation supports a role for *Alloiococcus otitidis* as a secondary  
506 pathogen. *BMC Ear Nose Throat Disord.* 2012;12.
- 507 57. Jervis-Bardy J, Rogers GB, Morris PS, Smith-Vaughan HC, Nosworthy E, Leong LEX,  
508 Smith RJ, Weyrich LS, De Haan J, Carney AS, et al. The microbiome of otitis media  
509 with effusion in Indigenous Australian children. *Int J Pediatr Otorhinolaryngol.*  
510 2015;79:1548-1555.
- 511 58. Ngo CC, Massa HM, Thornton RB, Cripps AW. Predominant bacteria detected from the  
512 middle ear fluid of children experiencing otitis media: A systematic review. *PLoS ONE.*  
513 2016;11:e0150949.
- 514 59. Hall-Stoodley L, Gieseke A, Nistico L, Nguyen D, Hayes J, Forbes M, Greenberg DP,  
515 Dice B, Burrows A, Wackym A, et al. Direct detection of bacterial biofilms on the  
516 middle-ear mucosa of children with chronic otitis media. *JAMA.* 2006;296:202-211.
- 517 60. Prakash R, Juyal D, Negi V, Pal S, Adekhadi S, Sharma M, Sharma N. Microbiology of  
518 chronic suppurative otitis media in a tertiary care setup of Uttarakhand State, India. *N*  
519 *Am J Med Sci.* 2013;5:282-287.
- 520 61. Kumar R, Agarwal R, Gupta S. A microbiological study of chronic suppurative otitis  
521 media. *Int J Recent Sci Res.* 2015;6:5487-5490.
- 522 62. Yeo S, Park D, Hong S, Cha C, Kim M. Bacteriology of chronic suppurative otitis media-  
523 -a multicenter study. *Acta Otolaryncol.* 2007;127:1062-1067.
- 524 63. Dayasena R, Dayasiri M, Jayasuriya C, Perera D. Aetiological agents in chronic  
525 suppurative otitis media in Sri Lanka. *Australas Med J.* 2011;4:101-104.
- 526 64. Aflobi O, Salaudeen A, Ologe F, Nsabuisi C, Nwawolo. Pattern of bacterial isolates in  
527 the middle ear discharge of patients with chronic suppurative otitis media in a tertiary  
528 hospital in North central Nigeria. *Afr Health Sci.* 2012;12:362-367.
- 529 65. Mittal R, Lisi C, Gerring R, Mittal J, Mattal J, Mathee K, Narasimhan G, Azad R, Grati  
530 M, Eshranghi A, et al. Current concepts in the pathogenesis and treatment of chronic  
531 suppurative otitis media. *J Med Microbiol.* 2015;64:1103-1116.



- 532 66. Neef M, Biswas K, Hoggard M, Taylor M, Douglas R. Molecular microbiological profile  
533 of chronic suppurative otitis media. *J Clin Microbiol.* 2016;54:2538-2546.
- 534 67. Kaya E, Dag I, Incesulu A, Gurbuz MK, Acar M, Birdane L. Investigation of the  
535 presence of biofilms in chronic suppurative otitis media, nonsuppurative otitis media, and  
536 chronic otitis media with cholesteatoma by scanning electron microscopy. *The Scientific*  
537 *World Journal.* 2013;2013:638715.
- 538 68. Lee MR, Pawlowski KS, Luong A, Furze AD, Sargent Roland P. Biofilm presence in  
539 humans with chronic suppurative otitis media. *Otolaryngol Head Neck Surg.*  
540 2009;141:567-571.
- 541 69. Thornton RB, Rigby PJ, Wiertsema SP, Filion P, Langlands J, Coates H, Vijayasekaran  
542 S, Keil AD, Richmond PC. Multi-species bacterial biofilm and intracellular infection in  
543 otitis media. *BMC Pediatr.* 2011;11:94.
- 544 70. Heikkinen T, Chonmaitree T. Importance of respiratory viruses in acute otitis media. *Clin*  
545 *Microbiol Rev.* 2003;16:230-241.
- 546 71. Abramson J, Giebink G, Quie P. Influenza A virus-induced polymorphonuclear leukocyte  
547 dysfunction in the pathogenesis of experimental pneumococcal otitis media. *Infect*  
548 *Immun.* 1982;36:289-296.
- 549 72. Chonmaitree T, Owen M, Howie V. Respiratory viruses interfere with bacteriologic  
550 response to antibiotic in children with acute otitis media. *J Infect Dis.* 1990;162:546-549.
- 551 73. Homøe P, Kvarner K, Damoiseaux RAMJ, van Dongen TMA, Gunasekera H, Jensen R,  
552 Morris P, Weinreich HM. Panel 1: Epidemiology and diagnosis. *Otolaryngol Head Neck*  
553 *Surg.* 2017;156:S1-S21.
- 554 74. Gunasekera H, Morris PS, Daniels J, Couzos S, Craig JC. Otitis media in Aboriginal  
555 children: the discordance between burden of illness and access to services in rural/remote  
556 and urban Australia. *J Paediatr Child Health.* 2009;45:425-430.
- 557 75. O'Grady K, Hall K, Sloots T, Anderson J, Chang A. Upper airway viruses and bacteria in  
558 urban Aboriginal and Torres Strait Islander children in Brisbane: A cross-sectional study.  
559 *BMC Infectious Diseases.* 2017;17:245.
- 560 76. Sillanpää S, Kramna L, Oikarinen S, Sipilä M, Rautiainen M, Aittoniemi J, Laranne J,  
561 Hyöty H, Cinek O. Next-generation sequencing combined with specific PCR assays to  
562 determine the bacterial 16S rRNA gene profiles of middle ear fluid collected from  
563 children with acute otitis media. *mSphere.* 2017;2:e00006-00017.
- 564 77. Sung JY, Hwang Y, Shin HM, Park MS, Lee SH, Yong D, Lee K. Utility of  
565 conventional culture and MALDI-TOF MS for identification of microbial communities  
566 in bronchoalveolar lavage fluid in comparison with GS junior next generation sequencing  
567 system. *Ann Lab Med.* 2018;38:110-118.

568

569

570 **Table 1: Risk of bias assessment**

|                      | Reference | Focused aim? | Cohort recruitment acceptable? | Exposure accurately measured? | Outcome accurately measured? | Confounding factors identified? | Confounding factors accounted for? | Are the results precise? | Are the results believable? | Do results fit with other available data | Overall quality score |
|----------------------|-----------|--------------|--------------------------------|-------------------------------|------------------------------|---------------------------------|------------------------------------|--------------------------|-----------------------------|------------------------------------------|-----------------------|
| 1972, Stuart*        | [46]      | +            | +                              | -                             | -                            | +                               | -                                  | -                        | -                           | -                                        | Poor                  |
| 1975, Copeman        | [44]      | -            | -                              | -                             | -                            | -                               | -                                  | ?                        | -                           | -                                        | Poor                  |
| 1975, Stuart         | [45]      | +            | +                              | -                             | -                            | -                               | -                                  | -                        | -                           | -                                        | Poor                  |
| 1985, Dawson         | [55]      | +            | -                              | +                             | +                            | -                               | -                                  | ?                        | -                           | -                                        | Poor                  |
| 1994, Leach          | [21]      | +            | +                              | +                             | +                            | -                               | -                                  | -                        | +                           | +                                        | Mod                   |
| 1996, Homøe          | [34]      | +            | +                              | +                             | +                            | +                               | +                                  | +                        | +                           | +                                        | Good                  |
| 1999, Parkinson      | [38]      | +            | +                              | +                             | +                            | -                               | -                                  | +                        | +                           | +                                        | Mod                   |
| 2003, Couzos*        | [40]      | +            | ?                              | +                             | +                            | +                               | +                                  | +                        | +                           | +                                        | Good                  |
| 2003, Stuart         | [49]      | +            | ?                              | +                             | +                            | +                               | -                                  | +                        | +                           | +                                        | Mod                   |
| 2005, Gibney         | [50]      | +            | +                              | +                             | ?                            | -                               | -                                  | +                        | +                           | +                                        | Poor                  |
| 2006, Leach*         | [51]      | +            | ?                              | +                             | +                            | -                               | -                                  | -                        | -                           | +                                        | Poor                  |
| 2007, Ashhurst-Smith | [37]      | +            | ?                              | +                             | +                            | -                               | -                                  | ?                        | +                           | -                                        | Mod                   |
| 2008, Leach*         | [43]      | +            | +                              | +                             | +                            | -                               | -                                  | +                        | +                           | +                                        | Mod                   |
| 2008, Leach*         | [54]      | +            | +                              | +                             | +                            | -                               | -                                  | +                        | +                           | +                                        | Poor                  |
| 2009, Homøe*         | [39]      | +            | +                              | +                             | +                            | -                               | -                                  | -                        | -                           | -                                        | Poor                  |
| 2009, Mackenzie*     | [52]      | +            | ?                              | -                             | +                            | -                               | -                                  | +                        | -                           | +                                        | Poor                  |
| 2010, Morris *       | [53]      | +            | +                              | +                             | +                            | +                               | +                                  | +                        | +                           | +                                        | Good                  |
| 2011, Binks          | [35]      | +            | ?                              | ?                             | +                            | -                               | -                                  | +                        | +                           | +                                        | Poor                  |
| 2012, Marsh          | [56]      | +            | ?                              | +                             | +                            | -                               | -                                  | +                        | +                           | +                                        | Mod                   |
| 2012, Sun            | [36]      | +            | +                              | +                             | +                            | +                               | +                                  | +                        | +                           | +                                        | Good                  |
| 2013, Smith-Vaughan  | [48]      | +            | +                              | +                             | +                            | -                               | -                                  | +                        | +                           | +                                        | Mod                   |
| 2013, Stephen*       | [42]      | +            | ?                              | +                             | +                            | -                               | -                                  | +                        | +                           | +                                        | Mod                   |
| 2015, Jervis-Bardy   | [57]      | +            | ?                              | +                             | +                            | +                               | +                                  | +                        | +                           | +                                        | Good                  |
| 2015, Leach*         | [47]      | +            | ?                              | +                             | +                            | -                               | -                                  | +                        | +                           | +                                        | Mod                   |
| 2016, Leach*         | [17]      | +            | ?                              | +                             | +                            | +                               | -                                  | +                        | +                           | +                                        | Mod                   |

571 Data based on CASP-based risk of bias assessment. Assessment of bias pertained to the

572 microbiology data, and not to clinical data.

573 \* Indicates studies where microbiological outcomes were not the primary outcome. ? indicates

574 that this variable was unable to be assessed.

575 **Table 2: Characteristics of included studies**

| Study                        | Reference | Total no. participants | Age (years) | Study type      |                               |                          |                            | Sample site |      |                  | Type of OM |       |     |      |                 | Analysis technique |                  |      |                |                                |                           |
|------------------------------|-----------|------------------------|-------------|-----------------|-------------------------------|--------------------------|----------------------------|-------------|------|------------------|------------|-------|-----|------|-----------------|--------------------|------------------|------|----------------|--------------------------------|---------------------------|
|                              |           |                        |             | Cross-sectional | Retrospective cross-sectional | Prospective longitudinal | Retrospective longitudinal | Nasopharynx | Nose | Middle ear fluid | AOM        | AOMwP | OME | CSOM | All types of OM | Culture            | Extended culture | qPCR | Viral testing* | Chlamydia testing <sup>†</sup> | 16S r RNA gene sequencing |
| Australian Indigenous        |           |                        |             |                 |                               |                          |                            |             |      |                  |            |       |     |      |                 |                    |                  |      |                |                                |                           |
| 1972, Stuart                 | [46]      | 100                    | 5-14        | ✓               |                               |                          |                            |             |      | ✓                |            | ✓     |     | ✓    |                 |                    | ✓                |      |                |                                |                           |
| 1975, Stuart                 | [45]      | 219                    | <2.5        |                 | ✓                             |                          |                            |             |      | ✓                |            | ✓     |     |      |                 |                    | ✓                |      |                |                                |                           |
| 1975, Copeman                | [44]      | 187                    | <15         | ✓               |                               |                          |                            |             |      | ✓                |            | ✓     |     |      |                 |                    | ✓                |      |                |                                |                           |
| 1985, Dawson                 | [55]      | 131                    | 2-15        | ✓               |                               |                          |                            |             |      | ✓                |            |       | ✓   |      |                 |                    | ✓                |      |                | ✓                              |                           |
| 1994, Leach                  | [21]      | 41                     | <0.75       |                 | ✓                             |                          | ✓                          |             |      |                  |            |       |     | ✓    |                 |                    | ✓                |      |                |                                |                           |
| 2003, Couzos                 | [40]      | 147                    | <15         | ✓               |                               |                          |                            |             |      | ✓                |            |       |     | ✓    |                 |                    | ✓                |      |                |                                |                           |
| 2003, Stuart                 | [49]      | 27                     | 1-10        | ✓               |                               |                          |                            |             |      | ✓                |            |       | ✓   |      |                 |                    | ✓                |      |                |                                |                           |
| 2005, Gibney <sup>^</sup>    | [50]      | 31                     | <8          |                 | ✓                             |                          | ✓                          |             |      | ✓                | ✓          |       |     |      |                 |                    | ✓                |      |                |                                |                           |
| 2006, Leach <sup>^</sup>     | [51]      | 21                     | <1.5        |                 |                               |                          | ✓                          |             |      | ✓                |            | ✓     |     |      |                 |                    | ✓                |      |                |                                |                           |
| 2007, Ashhurst-Smith         | [37]      | 50                     | 1-10        | ✓               |                               |                          |                            |             |      | ✓                |            |       | ✓   |      |                 |                    | ✓                | ✓    |                |                                |                           |
| 2008, Leach                  | [43]      | 97                     | 1-15        | ✓               |                               |                          |                            |             | ✓    | ✓                |            |       |     |      |                 |                    | ✓                |      |                |                                |                           |
| 2008, Leach <sup>^</sup>     | [54]      | 103                    | NR          | ✓               |                               |                          | ✓                          |             |      |                  |            |       | ✓   |      |                 |                    | ✓                |      |                |                                |                           |
| 2009, Mackenzie <sup>^</sup> | [52]      | 148                    | <2          |                 | ✓                             |                          |                            |             |      | ✓                |            | ✓     |     |      |                 |                    | ✓                |      |                |                                |                           |
| 2010, Morris <sup>±</sup>    | [53]      | 320                    | 0.5-6       | ✓               |                               |                          |                            |             | ✓    | ✓                |            | ✓     |     |      |                 |                    | ✓                |      |                |                                |                           |
| 2011, Binks <sup>^</sup>     | [35]      | 115                    | <2          |                 |                               |                          | ✓                          | ✓           |      |                  | ✓          | ✓     | ✓   |      |                 |                    |                  | ✓    |                |                                |                           |
| 2012, Marsh <sup>±</sup>     | [56]      | 27                     | 0.5-4       |                 | ✓                             |                          |                            | ✓           |      | ✓                |            | ✓     |     |      |                 |                    |                  | ✓    |                |                                |                           |
| 2013, Smith-Vaughan          | [48]      | 51                     | 0.25-3.8    |                 | ✓                             |                          |                            | ✓           |      | ✓                |            | ✓     |     |      |                 |                    | ✓                | ✓    |                |                                |                           |
| 2013, Stephen                | [42]      | 89                     | 5-12        | ✓               |                               |                          |                            | ✓           |      | ✓                |            |       | ✓   |      |                 |                    | ✓                |      |                |                                |                           |
| 2012, Sun                    | [36]      | 66                     | <2          |                 |                               | ✓                        |                            | ✓           |      |                  |            |       |     | ✓    |                 |                    | ✓                |      |                |                                |                           |
| 2015, Jervis-Bardy           | [57]      | 11                     | 3-10        | ✓               |                               |                          |                            | ✓           |      | ✓                |            |       | ✓   |      |                 |                    |                  |      |                |                                | ✓                         |
| 2015, Leach                  | [47]      | 60                     | <6          | ✓               |                               |                          |                            |             |      | ✓                |            |       | ✓   |      |                 |                    | ✓                |      |                |                                |                           |
| 2016, Leach                  | [17]      | 651                    | <6          | ✓               |                               |                          |                            |             |      | ✓                |            |       | ✓   |      |                 |                    | ✓                |      |                |                                |                           |



| Study             | Reference | Total no. participants | Age (years) | Study type      |                               |                          |                            | Sample site |      |                  | Type of OM |       |     |      |                 | Analysis technique |                  |      |                |                                |
|-------------------|-----------|------------------------|-------------|-----------------|-------------------------------|--------------------------|----------------------------|-------------|------|------------------|------------|-------|-----|------|-----------------|--------------------|------------------|------|----------------|--------------------------------|
|                   |           |                        |             | Cross-sectional | Retrospective cross-sectional | Prospective longitudinal | Retrospective longitudinal | Nasopharynx | Nose | Middle ear fluid | AOM        | AOMwP | OME | CSOM | All types of OM | Culture            | Extended culture | qPCR | Viral testing* | Chlamydia testing <sup>†</sup> |
| Greenlandic Inuit |           |                        |             |                 |                               |                          |                            |             |      |                  |            |       |     |      |                 |                    |                  |      |                |                                |
| 1996, Homøe       | [34]      | 255                    | <10         | ✓               |                               |                          |                            | ✓           |      | ✓                | ✓          |       |     |      |                 | ✓                  |                  | ✓    | ✓              |                                |
| 2009, Homøe       | [39]      | 10                     | 2-5         | ✓               |                               |                          |                            |             | ✓    |                  |            | ✓     | ✓   |      | ✓               |                    |                  |      |                | ✓                              |
| Alaskan Inuit     |           |                        |             |                 |                               |                          |                            |             |      |                  |            |       |     |      |                 |                    |                  |      |                |                                |
| 1999, Parkinson   | [38]      | 128                    | <5          | ✓               |                               |                          |                            |             | ✓    |                  |            | ✓     |     |      | ✓               |                    |                  |      |                |                                |

576 AOM, acute otitis media; AOMwP, acute otitis media with perforated tympanic membrane;

577 CSOM, chronic suppurative otitis media; OME, otitis media with effusion; No, number.

578 \* viral testing by qPCR [35] or PCR and immunofluorescent anti-body testing[11]; <sup>†</sup> *Chlamydia*

579 spp. testing by qPCR [11] and immunofluorescent anti-body testing[55]; <sup>°</sup> biofilm testing by

580 immersion microscopy Gram-staining, PNA-FISH (for *S. aureus*, coagulase negative

581 staphylococcus, *Escherichia coli*, and eubacterial probe) and confocal laser scanning

582 microscopy; <sup>^</sup> Overlapping participants; <sup>±</sup> Overlapping participants.

583 Note: For the longitudinal studies, data included in this review was per specimen, not per child.

584

**Figure 1: Literature search and selection**

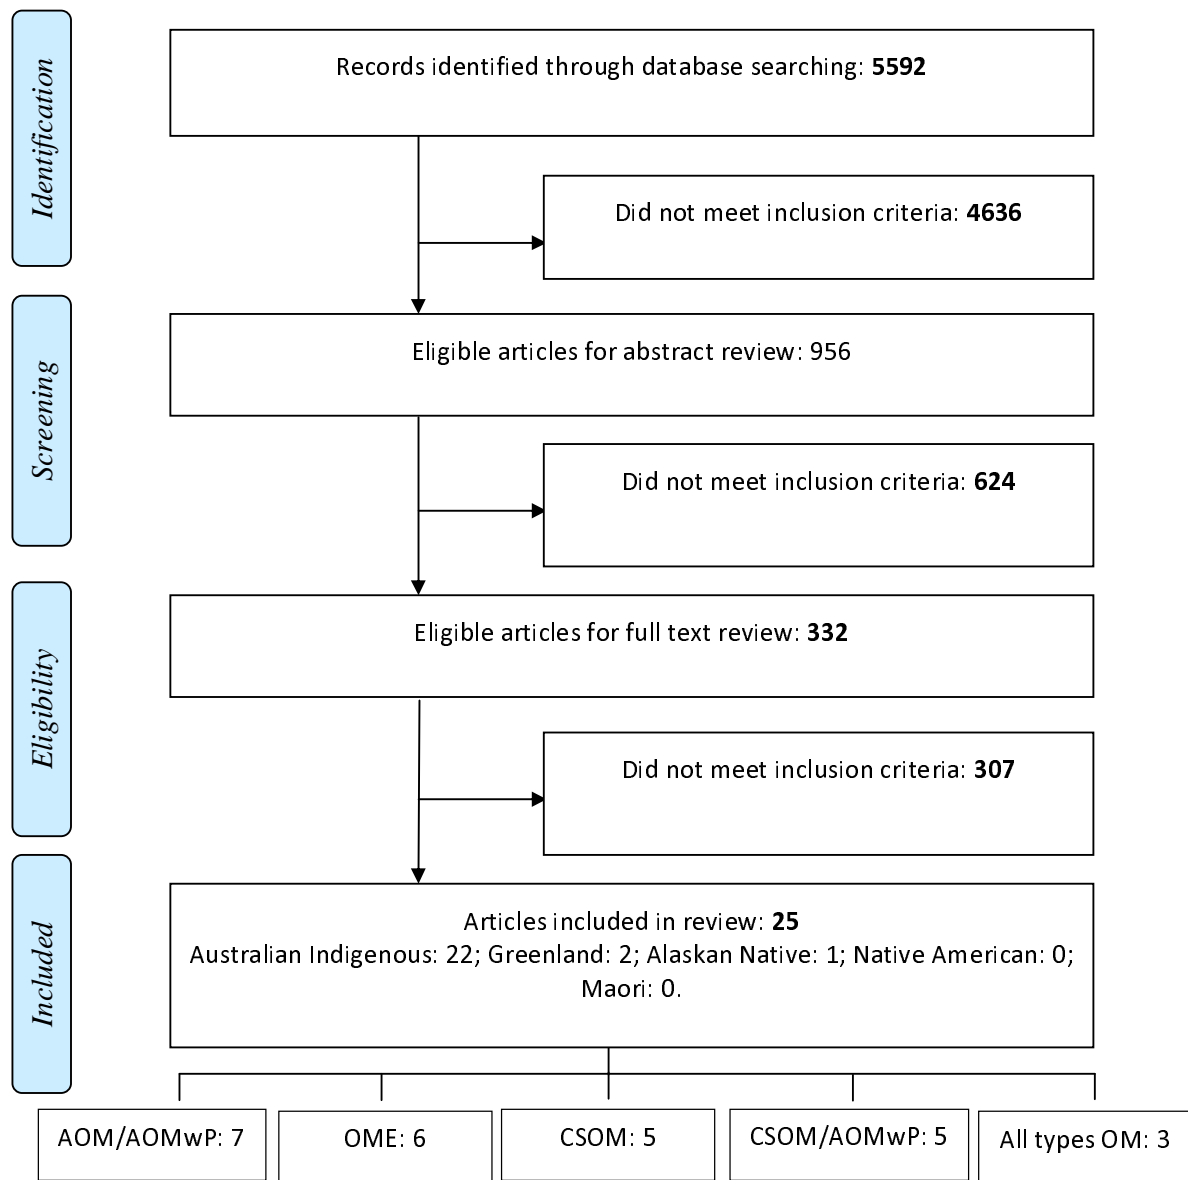

**Figure 2: Bacteriology in relation to acute otitis media**

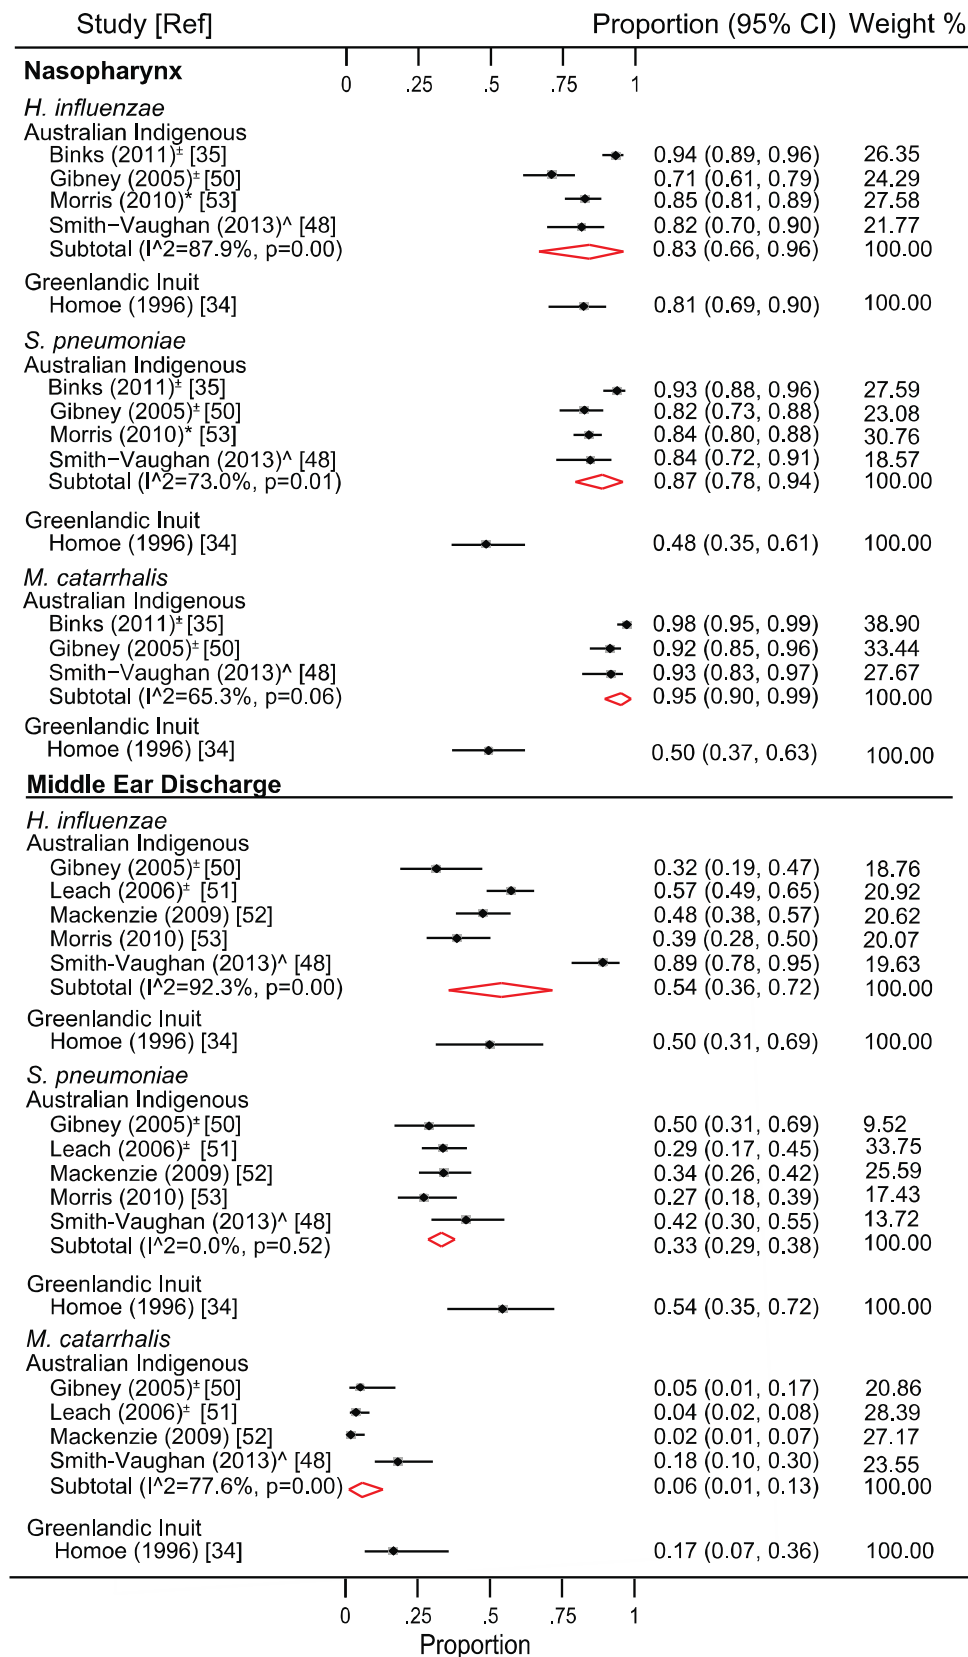

Note: Binks *et al*, 2011 combines AOM and AOMwP. \* nasal swabs. ^ PCR analysis; U/C, unable to calculate.

**Figure 3: Bacteriology in relation to otitis media with effusion**

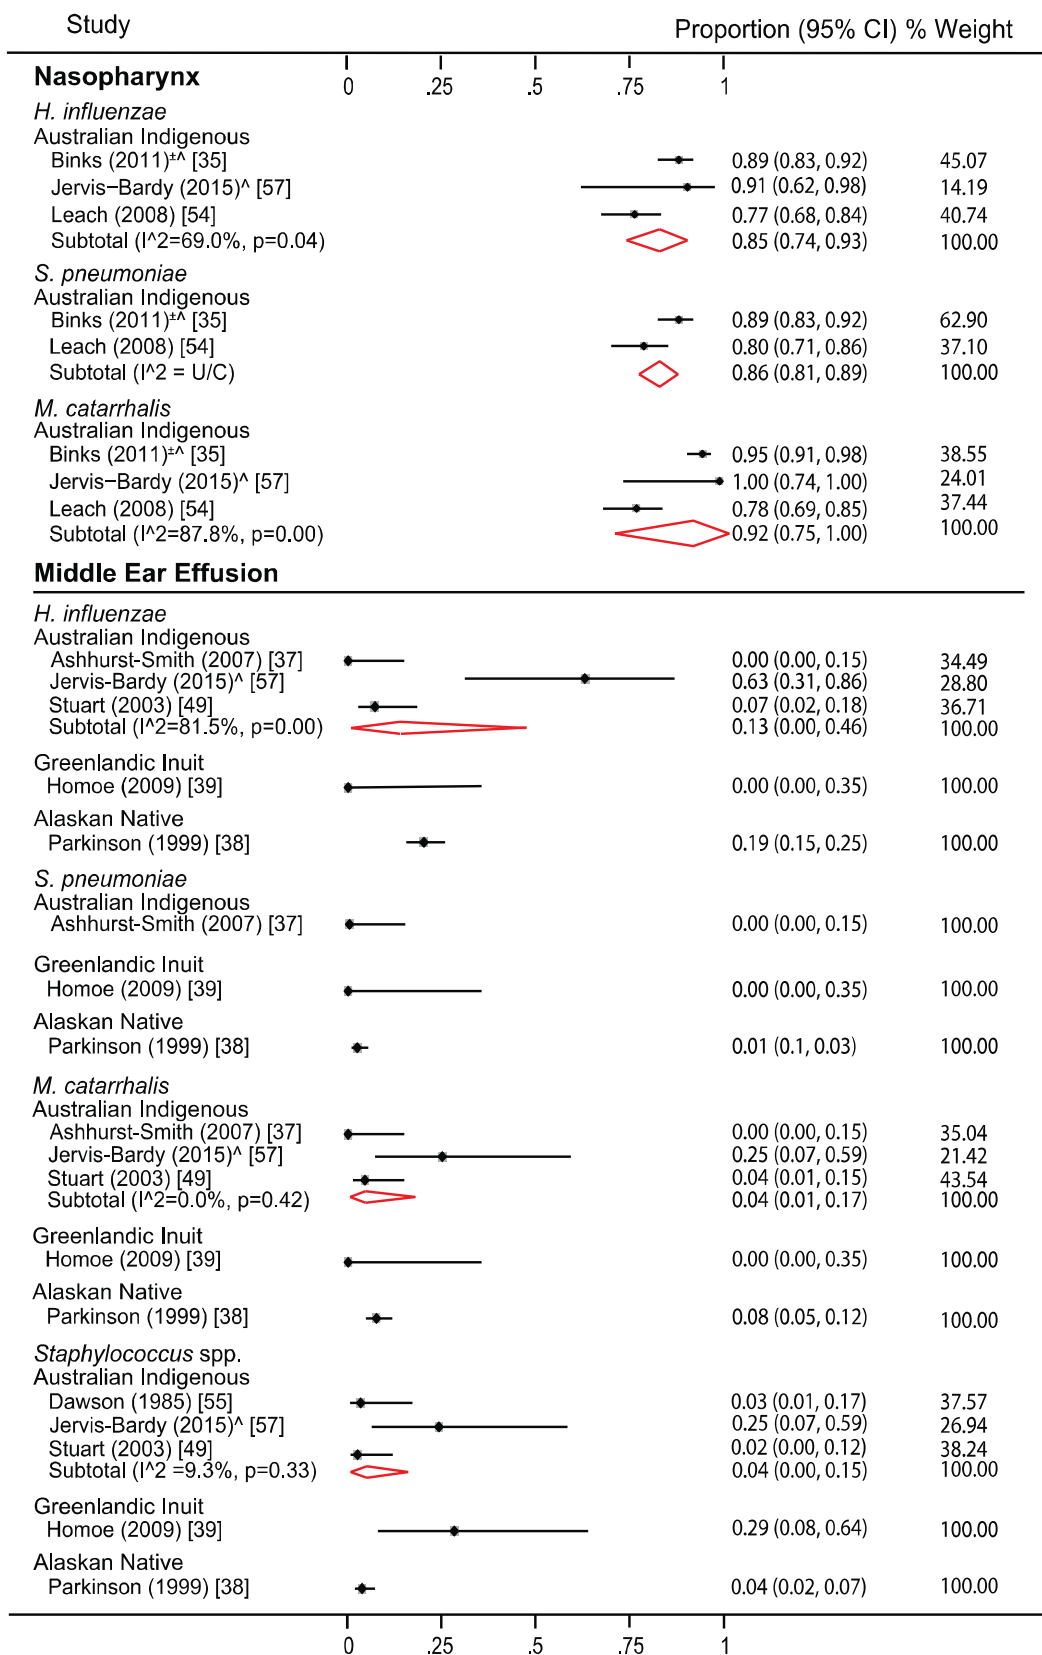

Note: <sup>A</sup> PCR/ next generation sequencing; U/C, unable to calculate.

**Figure 4: Bacteriology in relation to chronic suppurative otitis media**

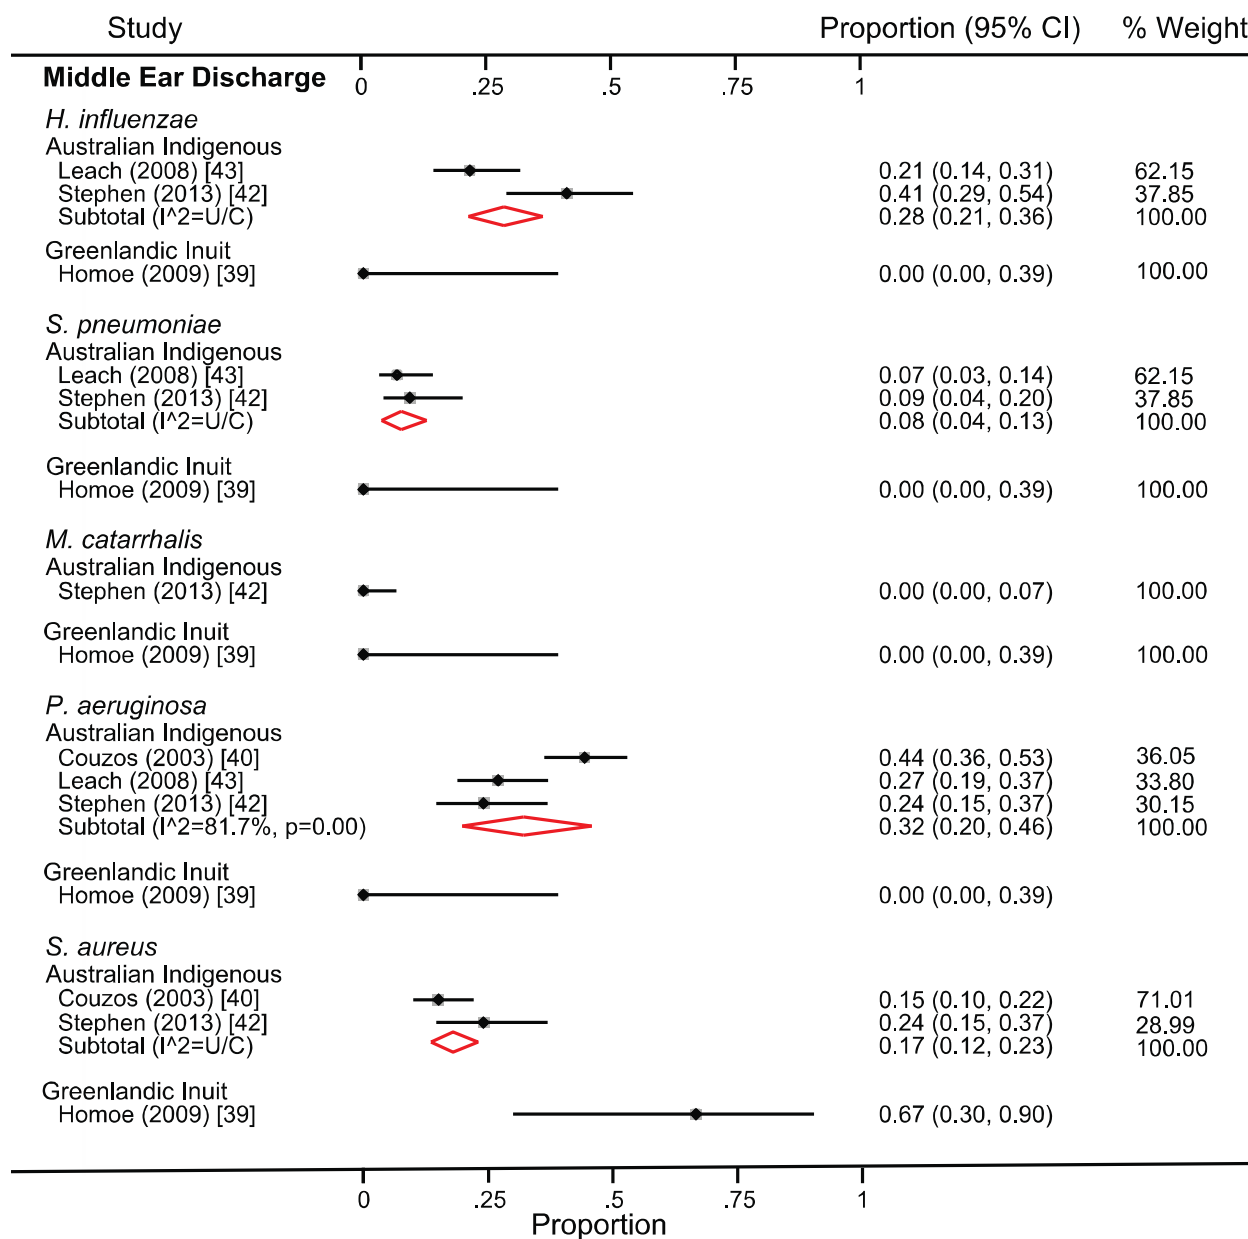

Note: U/C, unable to calculate.

### **Figure 5: Recommendations for future research of OM microbiology in indigenous children**

- Exploration of entire URT microbiota in indigenous populations. Understanding the entire microbiota can explore the hypothesis of dysbiosis in these populations. This can be achieved using either:
  - Metagenomic shot gun sequencing if techniques to remove human DNA advance;
  - 16S rRNA gene sequencing with adjunct qPCR; or
  - Extended culture with MALDI-TOF and adjunct qPCR – creates microbial resources for further studies, such as bacterial interference.
- Inclusion of healthy indigenous peers in microbiota studies to increase knowledge of the ‘healthy’ URT microbiota and identification of possible ‘protective’ microbes
- Inclusion of indigenous participants from diverse geographical, climactic and socioeconomic backgrounds to facilitate generalisation of results.
- Internationally standardised OM diagnostic criteria are needed to enable comparison of data amongst studies from different populations.
- Healthy indigenous control groups
- New therapies to prevent/ reduce colonisation with otopathogens in indigenous populations, including microbiome/ probiotic therapies.
